# Supplementary material
Source: Springer Nature journal article supplement (https://www.springermedizin.de/resource/supplementary/12882_2014_846_MOESM2_ESM.pdf/9454436)

**a**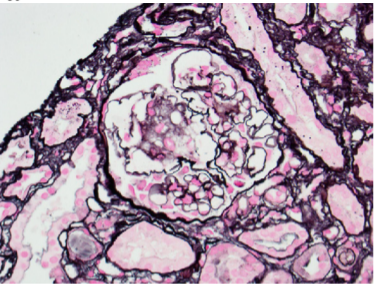**b**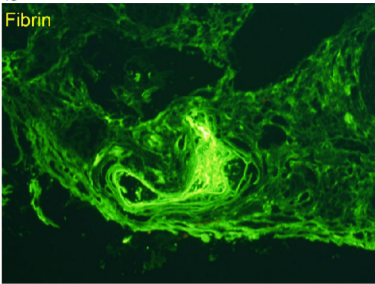**c**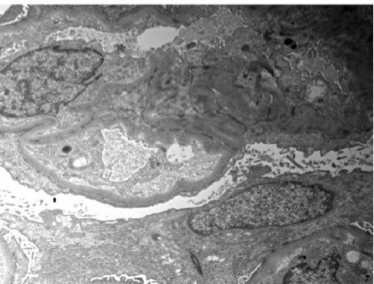

Supplement: MOESM2 [file 9454436]
